# Supplementary material
Source: PubMed Central journal article supplement (PMC4014292)
Supplement: supp_O113.032854_mcp.O113.032854-1.pdf [file supp_O113.032854_mcp.O113.032854-1.pdf]

# Figure S1

>gi|110680168:2846062-2846169 *Roseobacter denitrificans* OCh 114, complete genome

**ATG**ACCGAGCATGCACCC**GTG**AACAAGAAGCCGCC-----ACC-----AAAGTC---CCCACCCTGCCCGACGCGCAAACCGTGACCGCCGTGCAGCACTATACTGACCGTCTGTTTTCG

1 M T E H A P V N K E A A - - T - - - K V - P T L P D A Q T V T A V Q H Y T D R L F S

>gi|254476318:403134-403012 *Ruegeria* sp. R11, complete genome

**ATG**AATGAGATGACCTCC**GTG**ACCGACACAGCAACCGACCAGAAG---CCCGCCAAAGCCACCCCGCGCTGCCCGACGCACAGACCGTGACCGAGGTGAAGCACTGGACCGACCGCCTGTTTTCG

1 M N E M T S V T D T A T D Q K - P A K A T P A L P D A Q T V T E V K H W T D R L F S

>gi|159043699:1177432-1177313 *Dinoroseobacter shibae* DFL12, complete genome

**ATG**AACAAACCGACCGAC**GTG**ATGAGCACCGTGACAGACGCAACA---CCGATCAAAGTC---CCCACCCTCCGGATGCCCGACCGTGCTGTGCGGTCAAGCACTGGACAGACCGCCTGTTTTCG

1 M N K P T D V M S T V T D A T - P I K V - P T L P D A Q T V L S V K H W T D R L F S

>gi|84515523:295726-295601 *Loktanella vestfoldensis* SKA53, complete genome

**ATG**GGTCACGATGAACAT**ATG**ACAGAGCAAAGCCCCGTGAATCACGCCAGCGCCAAAATCGTCCCGCAATTGCCCGACATGCAGACCGTGACAGAGGTGAAACATTACACCGACCGGCTGTTTTCG

1 M G H D E H M T E Q S P V N H A S A K I V P Q L P D M Q T V T E V K H Y T D R L F S

>gi|99079841:1851729-1851854 *Ruegeria* sp. TM1040, complete genome

**ATG**AACGAGATTACGCC**GTG**AGTGAGCCTGTGACCGAAGCCCGCGCCTGCAAAGGCCAAACCCGCCCTGCCCGACGCCAGACCGTGACGCAAGTGAACACTGGACTGACCGGCTGTTTTCG

1 M N E I T P V S E P V T E A A A P A K A K P A L P D A Q T V T Q V K H W T D R L F S

>gi|149913791:70458-70571 *Roseobacter* sp. AzwK-3b, complete genome

**ATG**AACGAGATCAGCAC**ATG**ACCGAAGCACCCGCCAAGGCCGTC-----AAGACC---CCCACCCTGCCCGACGCGCAAAGTCACCCAAGTCACGCATTGGACGGATCGCCTGTTTTCG

1 M N E I S T V T E A P A K A V - - - K T - P T L P D A Q K V T Q V T H W T D R L F S

**Figure S1. Multiple translation start sites of the ferredoxin-NADP reductase (YP\_683175.1).** For this protein, two alternative initiation start sites were detected, the first one as an ATG codon and the second one as an GTG codon, 18 nucleotides downstream. A multiple sequence alignment with closely-related homologues demonstrates that both initiation sites are shown conserved in all the strains listed here. Current annotated codons are shown in red and the alternative codons are in blue. The correct initiation codons are underlined and in bold red. Blue lines represent the peptide sequence identified.
